# Supplementary material for: Epidemiological traits of the malaria-like parasite Polychromophilus murinus in the Daubenton’s bat Myotis daubentonii
Source: PubMed Central journal article supplement (PMC4269171; doi:10.1186/s13071-014-0566-7), 2014-12-09
Supplement: 13071_2014_566_MOESM1_ESM.pdf [file 13071_2014_566_MOESM1_ESM.pdf]

**Additional file 1: Supplementary Tables**

**Table S1.** Backward selection of the logistic regression of prevalence. The most insignificant terms were dropped until minimum AIC had been reached.

| <b>Dropped variable</b> | <b>AIC</b> | <b>df</b> | <b>Residual deviance</b> | <b><math>X^2</math></b> | <b><math>p</math></b> |
|-------------------------|------------|-----------|--------------------------|-------------------------|-----------------------|
| None (initial model)    | 214.71     | 179       | 186.71                   | -                       | -                     |
| <i>age x condition</i>  | 212.71     | 180       | 186.71                   | 4.96*10 <sup>-06</sup>  | 0.9982                |
| <i>sex x age</i>        | 210.77     | 181       | 186.77                   | 0.064221                | 0.7999                |
| <i>sex x condition</i>  | 209.15     | 182       | 187.15                   | 0.38227                 | 0.5364                |
| <i>age</i>              | 208.10     | 183       | 188.10                   | 0.94743                 | 0.3304                |
| <i>date x condition</i> | 207.68     | 184       | 189.68                   | 1.5781                  | 0.209                 |

**Table S2.** Backward selection of the parasitemia statistical model. Most insignificant terms were dropped from the count- or false-zero model (respectively  $\mu$  and  $\pi$ ) until minimum AIC had been reached.

| <b>Dropped variable</b>                   | <b>AICc</b> | <b>df</b> | <b>Loglikelihood</b> | <b><math>X^2</math></b> | <b><math>p</math></b> |
|-------------------------------------------|-------------|-----------|----------------------|-------------------------|-----------------------|
| None (Initial model)                      | 537.03      | 29        | -234.89              | -                       | -                     |
| <i>date x condition</i> from $\pi$        | 534.30      | 28        | -233.84              | 0.1065                  | 0.7442                |
| <i>length</i> from $\pi$                  | 531.57      | 27        | -233.88              | 0.0621                  | 0.8032                |
| <i>length</i> from $\mu$                  | 528.91      | 26        | -233.92              | 0.0983                  | 0.7539                |
| <i>date<sup>2</sup> x year</i> from $\mu$ | 525.51      | 24        | -234.93              | 2.0146                  | 0.3652                |
| <i>date</i> from $\pi$                    | 523.02      | 23        | -235.02              | 0.1717                  | 0.6786                |
| <i>sex x condition</i> from $\pi$         | 521.15      | 22        | -235.39              | 0.7532                  | 0.3855                |
| <i>sex</i> from $\pi$                     | 519.86      | 21        | -236.04              | 1.2984                  | 0.2545                |
| <i>sex x condition</i> from $\mu$         | 519.68      | 20        | -237.23              | 2.3795                  | 0.1229                |
| <i>sex</i> from $\mu$                     | 518.07      | 19        | -237.69              | 0.9173                  | 0.3382                |
| <i>year</i> from $\mu$                    | 514.29      | 17        | -238.28              | 1.1749                  | 0.5557                |
| <i>year x date</i> from $\pi$             | 511.39      | 15        | -239.25              | 1.9413                  | 0.3788                |
| <i>date<sup>2</sup></i> from $\pi$        | 509.52      | 14        | -239.50              | 0.5067                  | 0.4766                |
| <i>age x condition</i> from $\pi$         | 509.01      | 13        | -240.42              | 1.8424                  | 0.1747                |
| <i>condition</i> from $\pi$               | 506.81      | 12        | -240.48              | 0.1124                  | 0.7374                |
| <i>age</i> from $\pi$                     | 506.23      | 11        | -241.34              | 1.7196                  | 0.1897                |

**Table S3.** Stability of the backwards selection procedure, by using subsets of the prevalence data set. Variables retained in the model after backward selection are indicated by ‘P’ or ‘N’ depending on whether the estimate was positive or negative respectively. ‘-’ indicates the absence of this variable in the considered model. Subsets with lowest AIC are in bold.

| <b>Subset</b>             | <b>AIC</b>   | <b>Year</b> | <b>Day</b> | <b>Year:day</b> | <b>Sex</b> | <b>Age</b> | <b>Condition</b> | <b>Length</b> | <b>Sex:age</b> | <b>Sex:condition</b> | <b>Condition:age</b> | <b>Condition:day</b> |
|---------------------------|--------------|-------------|------------|-----------------|------------|------------|------------------|---------------|----------------|----------------------|----------------------|----------------------|
| All                       | 207.7        | N           | N          | P               | N          | -          | N                | N             | -              | -                    | -                    | -                    |
| 1 <sup>st</sup> 1/2       | 114.9        | -           | P          | -               | -          | -          | N                | -             | -              | -                    | -                    | -                    |
| <b>2<sup>nd</sup> 1/2</b> | <b>94.16</b> | <b>N</b>    | <b>N</b>   | <b>P</b>        | -          | -          | <b>N</b>         | -             | -              | -                    | -                    | <b>N</b>             |
| <b>1<sup>st</sup> 1/3</b> | <b>64.56</b> | -           | <b>P</b>   | -               | -          | -          | <b>N</b>         | -             | -              | -                    | -                    | <b>N</b>             |
| 2 <sup>nd</sup> 1/3       | 76.14        | N           | N          | P               | -          | P          | -                | -             | -              | -                    | -                    | -                    |
| 3 <sup>rd</sup> 1/3       | 68.85        | N           | N          | P               | -          | -          | N                | -             | -              | -                    | -                    | -                    |
